# Supplementary material for: The CF-Sputum Induction Trial (CF-SpIT) to assess lower airway bacterial sampling in young children with cystic fibrosis: a prospective internally controlled interventional trial
Source: PubMed Central journal article supplement (PMC5971213; doi:10.1016/s2213-2600(18)30171-1), 2018-06
Supplement: mmc1.pdf [file mmc1.pdf]

# THE LANCET

## Respiratory Medicine

### Supplementary appendix

This appendix formed part of the original submission and has been peer reviewed. We post it as supplied by the authors.

Supplement to: Ronchetti K, Tame J-D, Paisey C, et al. The CF-Sputum Induction Trial (CF-SpIT) to assess lower airway bacterial sampling in young children with cystic fibrosis: a prospective internally controlled interventional trial. *Lancet Respir Med* 2018; published online May 16. [http://dx.doi.org/10.1016/S2213-2600\(18\)30171-1](http://dx.doi.org/10.1016/S2213-2600(18)30171-1).

## **On-line appendix**

### **CF-SpIT Research Protocol for sputum-induction sampling**

- Sputum induction should be performed after a 2 hour fast.
- Make an initial assessment of the chest. Attach an oxygen saturation monitor and document oxygen saturations, heart rate, respiratory rate. Perform lung function in children older than 7 years old.
- Before the procedure, obtain a cough swab.
- Administer 200mcg salbutamol via metered dose inhaler and spacer to prevent bronchospasm.
- Use a jet nebuliser attached to wall oxygen at a flow rate of 5 l/min to deliver 8 ml of 7% sterile hypertonic saline for 15 minutes.
- Make an assessment of the chest every 5 minutes.
- Apply physiotherapy techniques during and after procedure, including chest percussion, vibration, active cycle of breathing techniques, PEP and assisted autogenic drainage.
- Obtain sputum either by expectoration (in children able to cooperate) or by suctioning through the nasopharynx or oropharynx using a sterile, mucus extractor or suction catheter size 6.
- Make a final assessment and document observations, oxygen saturations, and lung function in children over 7 years old.

### **DNA extraction**

All samples were centrifuged at 14 800 rpm in a microcentrifuge for 5 min and reduced to a volume of 400  $\mu$ L by pipetting off the supernatant. Highly viscous sputum was pretreated with 1:1 volume ratio of 4M guanidium thiocyanate to enable pipetting and enhance extraction. Total nucleic acids were extracted from all reduced samples using the automated Maxwell 16 DNA purification system and Tissue DNA kit (Promega) in accordance with the manufacturer's instructions. Extracted DNA samples were stored at  $-80^{\circ}\text{C}$  until further analysis.

### **Ribosomal Intergenic Spacer Analysis (RISA)**

Briefly, PCRs were set up with 5  $\mu$ L of extracted sputum DNA and 10 pmol of each RISA PCR primer (1406F, TGYACACACCGCCCGT, and 23SR, GGGTTBCCCCATTCRG). RISA amplicons (2  $\mu$ L of amplified DNA) were separated by microfluidics (Agilent 2100 Bioanalyzer; Agilent Technologies, Santa Clara, CA, USA), and their profiles were analysed using Gelcompar II (Applied Maths, SintMartens Latem, Belgium). DNA from pure bacterial cultures of reference cystic fibrosis pathogen species was used to generate control ITS amplicons for putative pathogen identification based on size correlation. Negative controls containing water were included with every batch of sputum DNA.

**Table : Bacterial isolates from 167 paired cough swab and sputum-induction samples**

| EVENT NUMBER<br>CF-SpIT | DATE       | COUGH SWAB   | SPUTUM INDUCTION                     |
|-------------------------|------------|--------------|--------------------------------------|
| 1                       | 23/01/2012 |              | failed                               |
| 2                       | 26/01/2012 | P.aeruginosa | P.aeruginosa                         |
| 3                       | 02/02/2012 |              |                                      |
| 5                       | 22/02/2012 |              | H.influenzae                         |
| 6                       | 28/02/2012 |              | failed                               |
| 7                       | 27/03/2012 |              | E.coli                               |
| 8                       | 30/03/2012 |              | M.abscessus                          |
| 9                       | 03/04/2012 |              | Phyllobacterium species              |
| 11                      | 17/04/2012 |              |                                      |
| 12                      | 23/04/2012 | P.aeruginosa | P.aeruginosa                         |
| 13                      | 24/04/2012 |              |                                      |
| 14                      | 22/05/2012 |              |                                      |
| 15                      | 22/05/2012 |              | B.multivorans                        |
| 16                      | 11/06/2012 | E.coli       | failed                               |
| 17                      | 14/06/2012 |              | P.aeruginosa                         |
| 18                      | 18/06/2012 |              |                                      |
| 19                      | 22/06/2012 |              | S.aureus                             |
| 20                      | 28/06/2012 |              | failed                               |
| 21                      | 10/07/2012 |              | P.aeruginosa, S. marcescens, MAI     |
| 22                      | 17/07/2012 | S.aureus     | S.aureus, H.influenzae, P.aeruginosa |
| 23                      | 26/07/2012 |              |                                      |
| 24                      | 06/08/2012 |              | failed                               |
| 25                      | 14/08/2012 |              |                                      |
| 26                      | 28/08/2012 |              | failed                               |
| 27                      | 18/09/2012 |              |                                      |
| 28                      | 25/09/2012 |              | failed                               |
| 30                      | 09/10/2012 |              | P.aeruginosa                         |
| 31                      | 23/10/2012 | S.aureus     |                                      |
| 32                      | 25/10/2012 |              |                                      |
| 33                      | 29/10/2012 |              | S.aureus                             |
| 34                      | 30/10/2012 |              |                                      |
| 35                      | 30/10/2012 |              |                                      |
| 36                      | 01/11/2012 |              |                                      |
| 37                      | 07/11/2012 | S.aureus     | S.aureus, S.maltophilia              |
| 38                      | 27/11/2012 |              |                                      |
| 39                      | 11/12/2012 |              |                                      |
| 40                      | 07/01/2013 |              |                                      |
| 41                      | 08/01/2013 |              |                                      |
| 42                      | 04/02/2013 |              | failed                               |
| 43                      | 05/02/2013 |              |                                      |

| EVENT NUMBER<br>CF-SpIT | DATE       | COUGH SWAB                          | SPUTUM INDUCTION                        |
|-------------------------|------------|-------------------------------------|-----------------------------------------|
| 44                      | 11/02/2013 | B.multivorans                       | B. multivorans                          |
| 45                      | 28/02/2013 |                                     | B.cenocepacia                           |
| 46                      | 27/03/2013 |                                     | failed                                  |
| 47                      | 27/03/2013 | H.influenzae                        | H.influenzae                            |
| 48                      | 10/04/2013 |                                     |                                         |
| 49                      | 10/04/2013 |                                     |                                         |
| 50                      | 17/04/2013 |                                     |                                         |
| 51                      | 30/04/2013 |                                     |                                         |
| 52                      | 07/05/2013 |                                     | failed                                  |
| 53                      | 09/05/2013 |                                     |                                         |
| 54                      | 15/05/2013 |                                     |                                         |
| 55                      | 20/05/2013 |                                     | failed                                  |
| 56                      | 21/05/2013 |                                     | failed                                  |
| 57                      | 06/06/2013 |                                     | E. Cloacae                              |
| 58                      | 24/06/2013 |                                     | P.aeruginosa                            |
| 59                      | 25/06/2013 |                                     | failed                                  |
| 60                      | 01/07/2013 |                                     | P.aeruginosa                            |
| 61                      | 20/08/2013 |                                     | failed                                  |
| 63                      | 12/09/2013 | S.aureus, K.pneumoniae, E. asburiae | S.aureus, K.pneumoniae                  |
| 64                      | 16/09/2013 |                                     |                                         |
| 65                      | 25/09/2013 |                                     | P.aeruginosa                            |
| 66                      | 27/09/2013 |                                     | S. marcescens                           |
| 67                      | 27/09/2013 |                                     |                                         |
| 68                      | 30/09/2013 |                                     |                                         |
| 69                      | 08/10/2013 |                                     |                                         |
| 70                      | 09/10/2013 |                                     | A. xylooxidans, E.coli                  |
| 71                      | 18/10/2013 |                                     | P.aeruginosa                            |
| 72                      | 23/10/2013 |                                     | K.pneumoniae                            |
| 73                      | 25/10/2013 |                                     | S.aureus                                |
| 75                      | 25/11/2013 |                                     | M.abscessus                             |
| 78                      | 06/01/2014 |                                     | P.aeruginosa, B.multivorans, E.Asburiae |
| 79                      | 16/01/2014 | P.aeruginosa                        |                                         |
| 80                      | 22/01/2014 |                                     | S.aureus                                |
| 83                      | 18/03/2014 |                                     |                                         |
| 84                      | 18/03/2014 |                                     |                                         |
| 85                      | 19/03/2014 |                                     |                                         |
| 86                      | 25/03/2014 |                                     |                                         |
| 87                      | 07/04/2014 |                                     |                                         |
| 89                      | 30/04/2014 |                                     |                                         |
| 90                      | 18/07/2014 |                                     |                                         |
| 91                      | 21/07/2014 | S.aureus, S.maltophilia             | S.aureus, S.maltophilia                 |
| 92                      | 13/08/2014 |                                     | S.aureus                                |
| 93                      | 20/08/2014 | P.aeruginosa                        | P.aeruginosa                            |

| EVENT NUMBER<br>CF-SpIT | DATE       | COUGH SWAB           | SPUTUM INDUCTION                       |
|-------------------------|------------|----------------------|----------------------------------------|
| 94                      | 27/08/2014 |                      |                                        |
| 95                      | 16/09/2014 |                      | S. marcescens                          |
| 96                      | 16/09/2014 |                      | S. marcescens                          |
| 97                      | 25/11/2014 |                      |                                        |
| 98                      | 12/01/2015 |                      |                                        |
| 99                      | 06/02/2015 |                      |                                        |
| 101                     | 03/03/2015 |                      |                                        |
| 103                     | 10/04/2015 |                      |                                        |
| 104                     | 16/04/2015 | H.influenzaeS.aureus | H.influenzae, S.aureus, B.multivorans  |
| 105                     | 28/05/2015 |                      |                                        |
| 106                     | 02/06/2015 |                      |                                        |
| 107                     | 06/02/2015 |                      | B.cepacia                              |
| 108                     | 25/06/2015 |                      | S.aureus, B.vietnamensis               |
| 109                     | 30/06/2015 |                      |                                        |
| 110                     | 30/06/2015 | serratia             | S.marcescens                           |
| 111                     | 30/06/2015 |                      | failed                                 |
| 112                     | 07/07/2015 | H.influenzae         | H.influenzae                           |
| 113                     | 07/07/2015 |                      | failed                                 |
| 114                     | 14/07/2015 |                      |                                        |
| 115                     | 16/07/2015 |                      |                                        |
| 116                     | 21/07/2015 | PSS                  |                                        |
| 117                     | 21/07/2015 | MRSA                 | MRSA, H.influenzae                     |
| 118                     | 28/07/2015 |                      | H.influenzae                           |
| 119                     | 04/08/2015 |                      |                                        |
| 120                     | 11/08/2015 |                      | failed                                 |
| 121                     | 13/08/2015 |                      | S.maltophilia                          |
| 122                     | 18/08/2015 |                      |                                        |
| 123                     | 20/08/2015 |                      |                                        |
| 124                     | 25/08/2015 |                      |                                        |
| 125                     | 27/08/2015 |                      |                                        |
| 126                     | 01/09/2015 | S.aureus             | S.aureus, E.coli, Exophalia            |
| 127                     | 17/09/2015 |                      |                                        |
| 128                     | 22/09/2015 |                      |                                        |
| 129                     | 22/09/2015 |                      | H.influenzae, S.aureus, Pseudomonas sp |
| 130                     | 06/10/2015 |                      | failed                                 |
| 131                     | 06/10/2015 |                      | P.aeruginosa, B.multivorans            |
| 132                     | 13/10/2015 |                      |                                        |
| 133                     | 13/10/2015 |                      |                                        |
| 134                     | 14/10/2015 |                      | MRSA                                   |
| 135                     | 20/10/2015 |                      |                                        |
| 136                     | 20/10/2015 |                      |                                        |
| 137                     | 27/10/2015 |                      | P.aeruginosa                           |
| 138                     | 02/10/2015 |                      | P.aeruginosa                           |

| EVENT NUMBER<br>CF-SpIT | DATE       | COUGH SWAB    | SPUTUM INDUCTION                                |
|-------------------------|------------|---------------|-------------------------------------------------|
| 139                     | 10/11/2015 |               | S.aureus, P.aeruginosa, A. Fumigatus, Exophiala |
| 140                     | 17/11/2015 | klebsiella    | H.influenzae                                    |
| 141                     | 24/11/2015 |               | failed                                          |
| 142                     | 01/12/2015 |               | failed                                          |
| 143                     | 15/12/2015 |               | failed                                          |
| 144                     | 12/01/2016 |               | H.influenzae                                    |
| 145                     | 12/01/2016 |               |                                                 |
| 146                     | 19/01/2016 | E.coli        | E.coli, H.influenzae, S.aureus                  |
| 147                     | 21/01/2016 | S.aureus      | S.aureus                                        |
| 149                     | 28/01/2016 |               | failed                                          |
| 150                     | 02/02/2016 |               | H.influenzae                                    |
| 151                     | 02/02/2016 |               |                                                 |
| 152                     | 09/02/2016 | P.aeruginosa  |                                                 |
| 153                     | 09/02/2016 | S. marcescens | S. Marcescens                                   |
| 154                     | 16/02/2016 |               |                                                 |
| 155                     | 16/02/2016 |               |                                                 |
| 156                     | 23/02/2016 |               | S.aureus                                        |
| 157                     | 19/02/2016 |               |                                                 |
| 158                     | 10/03/2016 |               |                                                 |
| 159                     | 15/03/2016 | H.influenzae  |                                                 |
| 160                     | 29/03/2016 |               |                                                 |
| 161                     | 05/04/2016 | E.coli        | E.coli                                          |
| 162                     | 05/04/2016 |               | failed                                          |
| 163                     | 05/04/2016 |               |                                                 |
| 165                     | 19/04/2016 |               | P.aeruginosa                                    |
| 166                     | 26/04/2016 |               |                                                 |
| 167                     | 03/05/2016 |               |                                                 |
| 168                     | 10/05/2016 | A. Fumigatus  |                                                 |
| 169                     | 18/05/2016 |               | failed                                          |
| 170                     | 17/05/2016 |               | failed                                          |
| 171                     | 23/05/2016 |               |                                                 |
| 172                     | 24/05/2016 | H.influenzae  | H.influenzae                                    |
| 173                     | 24/05/2016 |               |                                                 |
| 174                     | 26/05/2016 | P.aeruginosa  | P.aeruginosa                                    |
| 175                     | 14/07/2016 |               | failed                                          |
| 176                     | 19/07/2016 |               | P.aeruginosa                                    |
| 177                     | 19/07/2016 |               | P.aeruginosa                                    |
| 178                     | 21/07/2016 |               |                                                 |
| 179                     | 25/07/2016 | S.aureus      | S.aureus                                        |
| 180                     | 26/07/2016 |               | failed                                          |
| 182                     | 02/08/2016 |               | failed                                          |
| 183                     | 02/08/2016 |               | failed                                          |
| 184                     | 11/08/2016 |               | H.influenzae                                    |

| EVENT NUMBER<br>CF-SpIT | DATE       | COUGH SWAB    | SPUTUM INDUCTION     |
|-------------------------|------------|---------------|----------------------|
| 186                     | 30/08/2016 |               | P.aeruginosa         |
| 188                     | 27/09/2016 |               |                      |
| 189                     | 12/10/2016 |               |                      |
| 190                     | 19/10/2016 |               | S.aureus             |
| 191                     | 21/10/2016 |               | P.aeruginosa,        |
| 192                     | 04/10/2016 |               |                      |
| 193                     | 13/10/2016 |               | failed               |
| 194                     | 27/10/2016 |               |                      |
| 195                     | 01/11/2016 |               |                      |
| 196                     | 02/11/2016 |               | lightgryeast         |
| 197                     | 15/11/2016 |               | A.fumigatus          |
| 198                     | 06/12/2016 |               |                      |
| 199                     | 08/12/2016 | P.aeruginosa  | E.cloacae            |
| 200                     | 13/12/2016 |               |                      |
| 201                     | 20/12/2016 |               |                      |
| 202                     | 31/01/2017 |               | failed               |
| 203                     | 31/01/2017 |               | M. abscessus         |
| 204                     | 07/02/2017 | S.maltophilia | failed               |
| 205                     | 07/02/2017 |               |                      |
| 206                     | 09/02/2017 |               |                      |
| 207                     | 14/02/2017 | S.maltophilia |                      |
| 208                     | 14/02/2017 |               | M. abscessus         |
| 209                     | 23/02/2017 |               |                      |
| 211                     | 07/03/2017 |               | failed               |
| 212                     | 08/03/2017 |               | E.coli, H.influenzae |
| 213                     | 21/03/2017 |               |                      |
| 214                     | 23/03/2017 |               |                      |
| 216                     | 04/07/2017 |               |                      |
| 217                     | 05/07/2017 |               | P.aeruginosa         |
| 218                     | 04/07/2017 |               | MRSA                 |
| 219                     | 04/07/2017 |               |                      |
|                         |            |               |                      |
